# Supplementary material
Source: Springer Nature journal article supplement (https://www.springermedizin.de/resource/supplementary/12889_2010_2811_MOESM1_ESM.pdf/9489526)
Supplement: MOESM1 [file 9489526]

Drawn classes: 3052

Director/class teacher refused: 921 classes

Participating classes: 2131

Return rate - classes: 69.8 %

Class level

Drawn students: 71891

Students in participating classes: 50708

Participating students: 44610

Return rate - students:  
88.0 % (without director refusal)  
62.1 % (all drawn students)

Student level

Director/class teacher refused: 21181 students

Not participated: 6098 students

Reasons:  
→ 711 parents refused  
→ 474 student refused  
→ 4713 absent (sickness, student exchange, truancy, other)  
→ 200 obviously not seriously filled out
